# Supplementary material for: Mechanism insight into the high-efficiency catalytic killing of E. coli by metal–phenolic network as a nanozyme
Source: Royal Society of Chemistry journal article supplement (doi:10.1039/d4ra00481g), 2024-01-01
Supplement: d4ra00481g1.pdf [file d4ra00481g1.pdf]

## Electronic Supplementary Material (ESI)

### **Mechanism Insight into the High-efficiency Catalytic Killing of *E. coli* by Metal-phenolic Network as a Nanozyme**

Weiyun Guo<sup>a, b, c\*</sup>, Chaoyun Wu<sup>a, b</sup>, Guanghui Li<sup>a</sup>, Yonghui Wang<sup>a</sup>, Shenghua He<sup>a</sup>, Jihong Huang<sup>a, c</sup>, Xueli Gao<sup>a</sup>, Xiaoyue Yue<sup>b</sup>

<sup>a</sup> Food and Pharmacy College, Xuchang University, Xuchang 461000, China;

<sup>b</sup> College of Food and Bioengineering, Zhengzhou University of Light Industry, Zhengzhou 450001, China;

<sup>c</sup> Food Laboratory of Zhongyuan. Luohe 462000, China;

## 1.1 Supplementary Figures

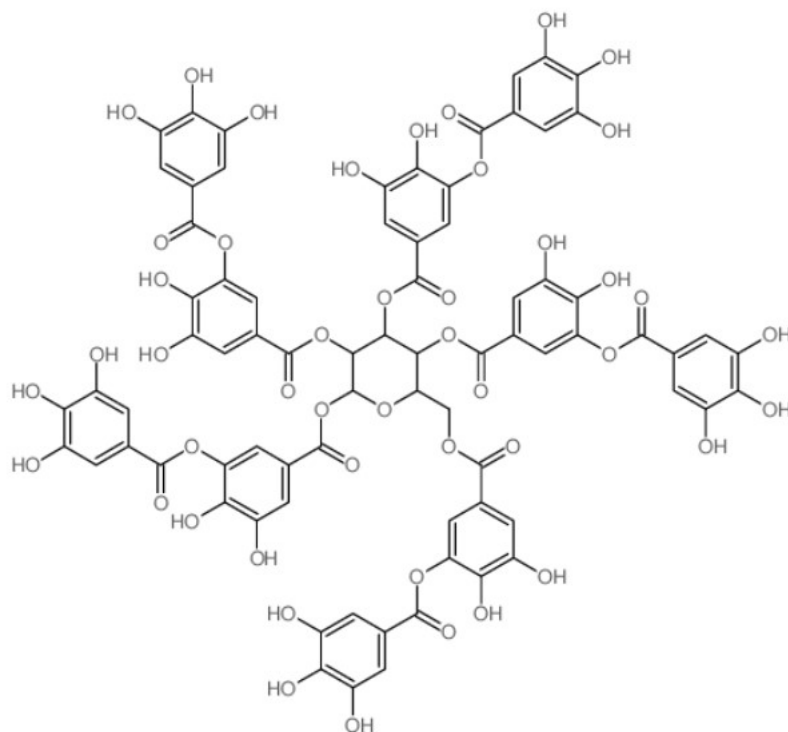

**Supplementary Figure 1.** The structure of the Tannic acid.

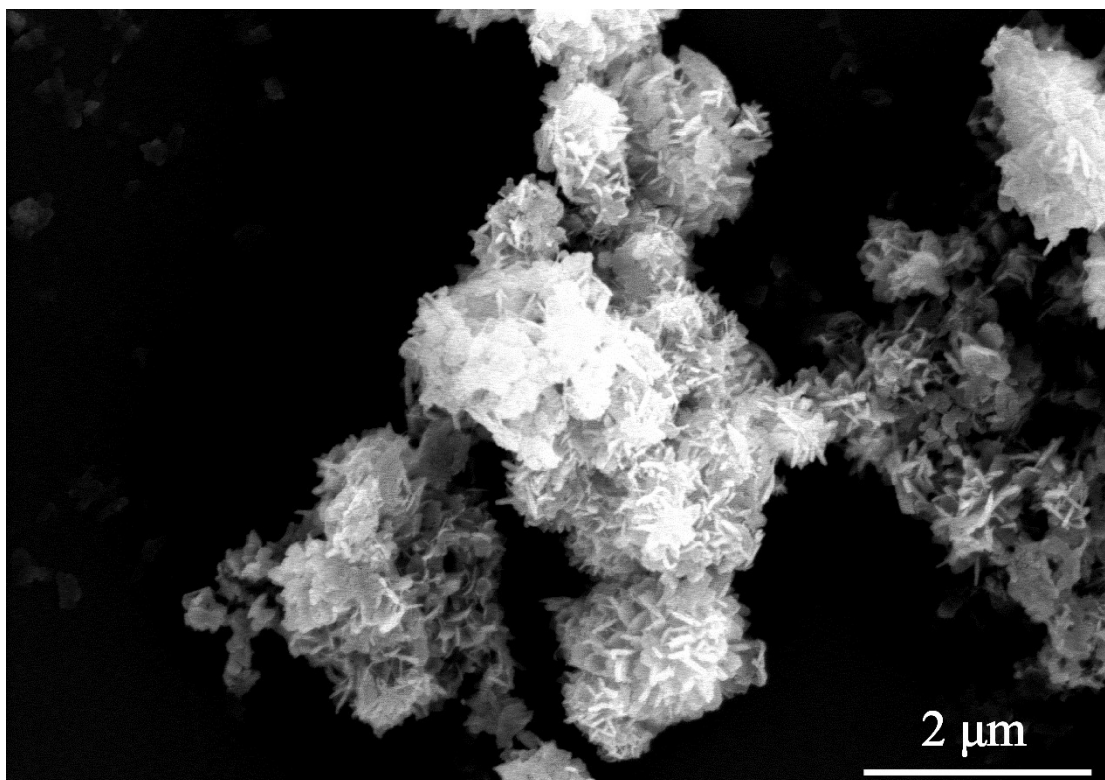

**Supplementary Figure 2.** SEM image of CuTA nanozyme.

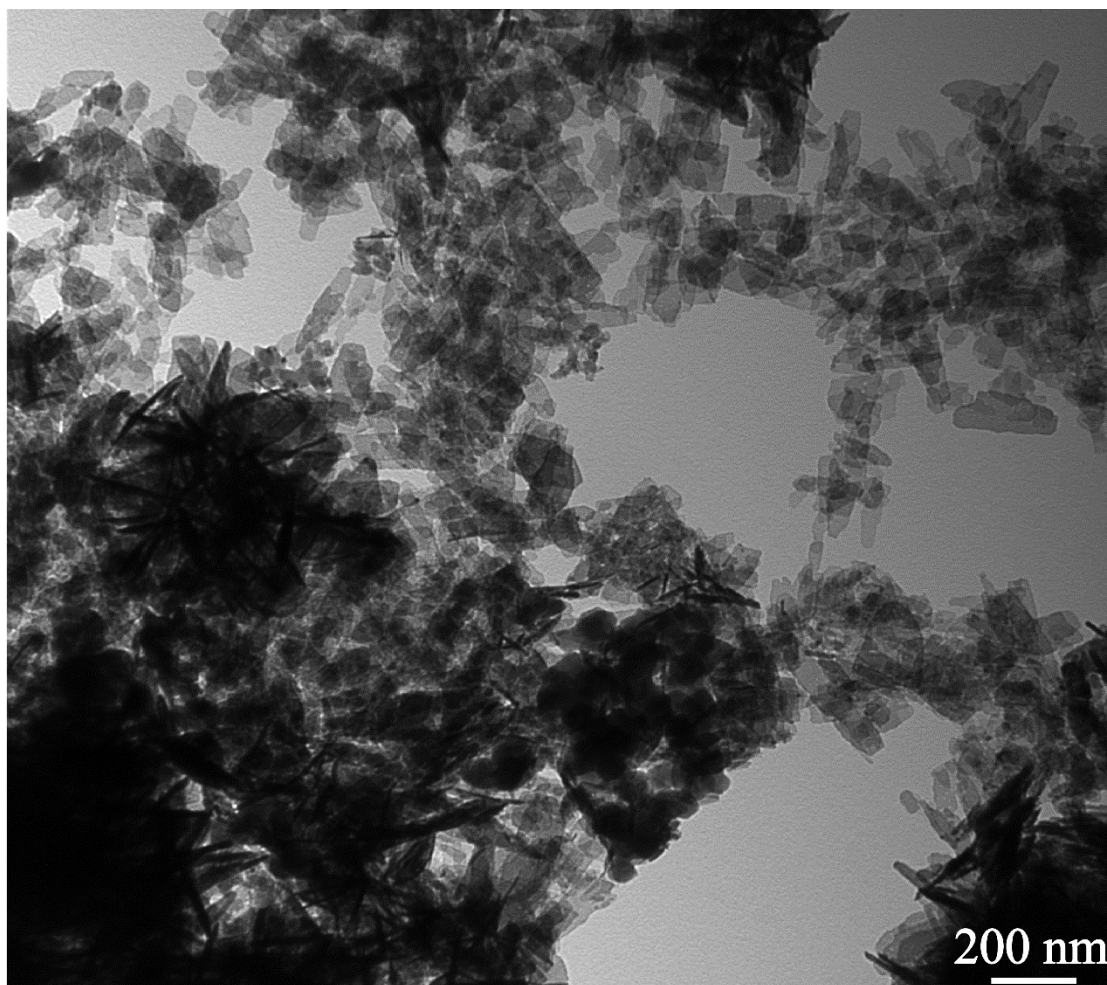

**Supplementary Figure 3.** TEM image of CuTA nanozyme.

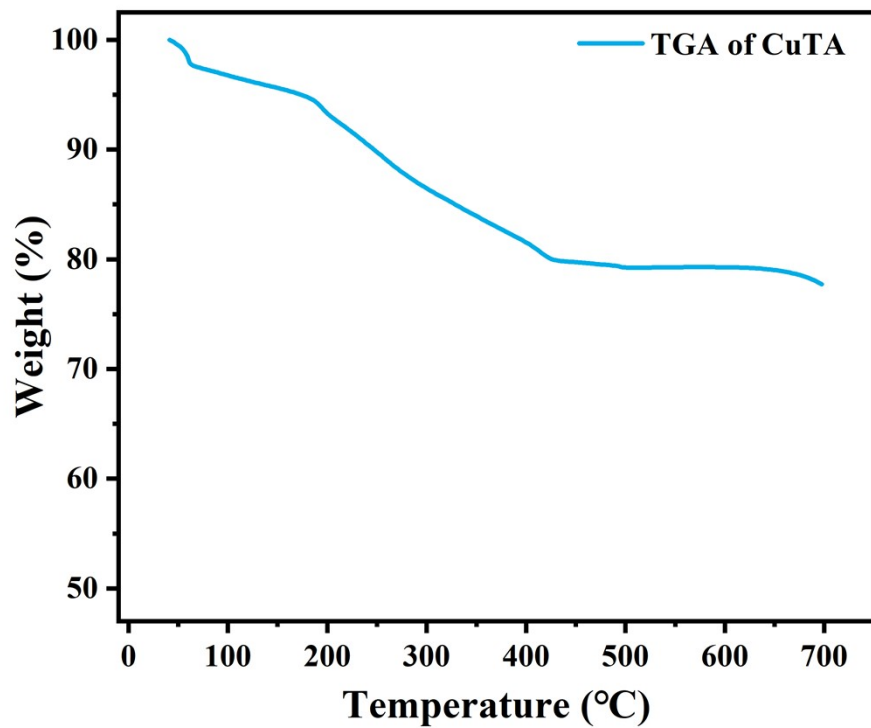

Supplementary Figure 4. TGA analysis of CuTA.

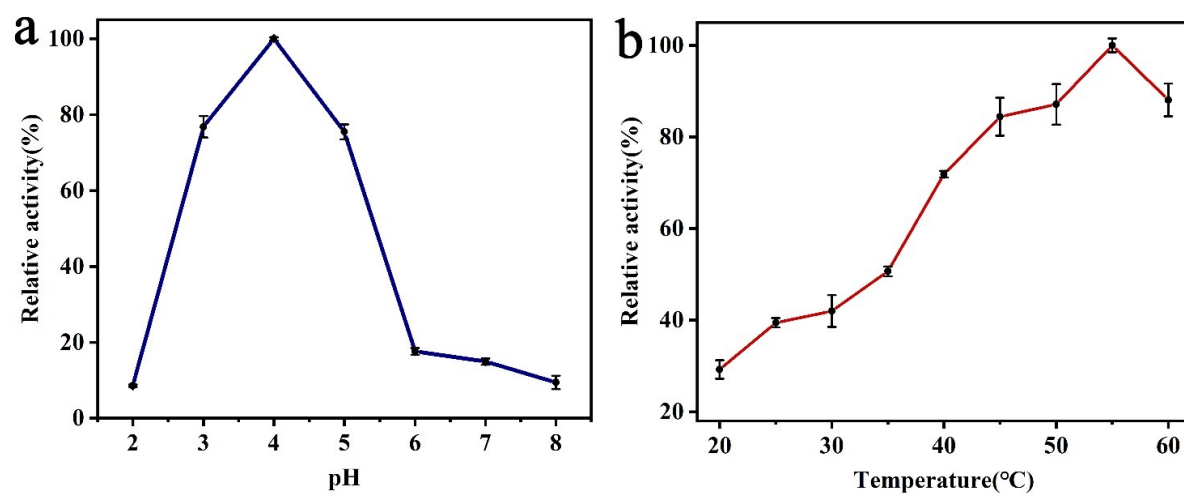

**Supplementary Figure 5.** (a) pH and (b) temperature optimization of the catalytic activity of CuTA peroxidases

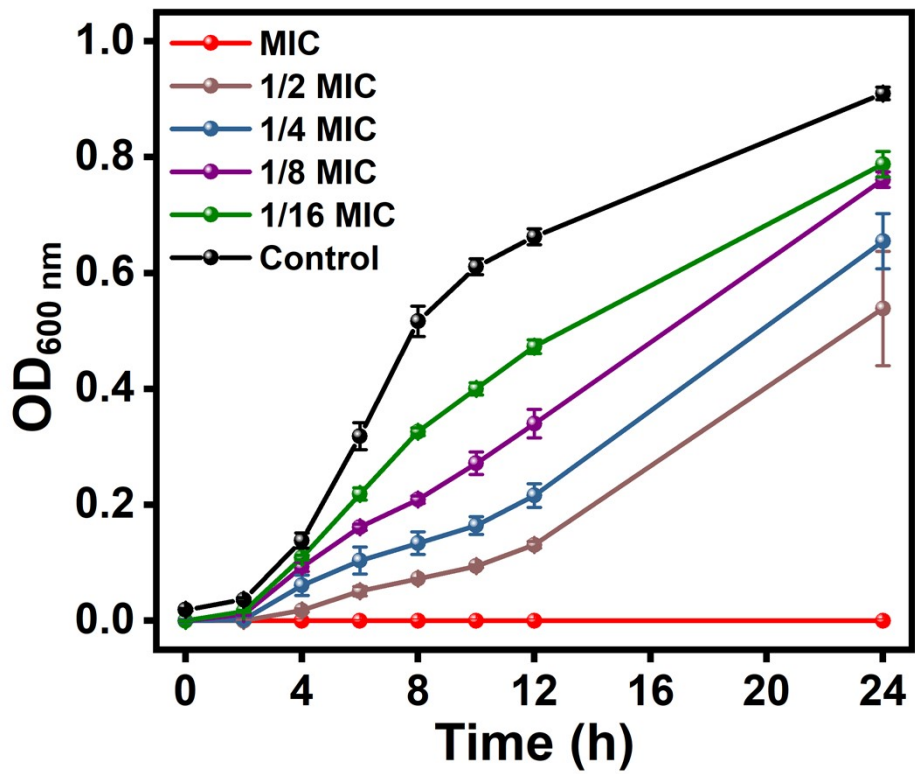

Supplementary Figure 6. Growth curve analysis of *E. coli* with or without the presence of various CuTA concentrations.

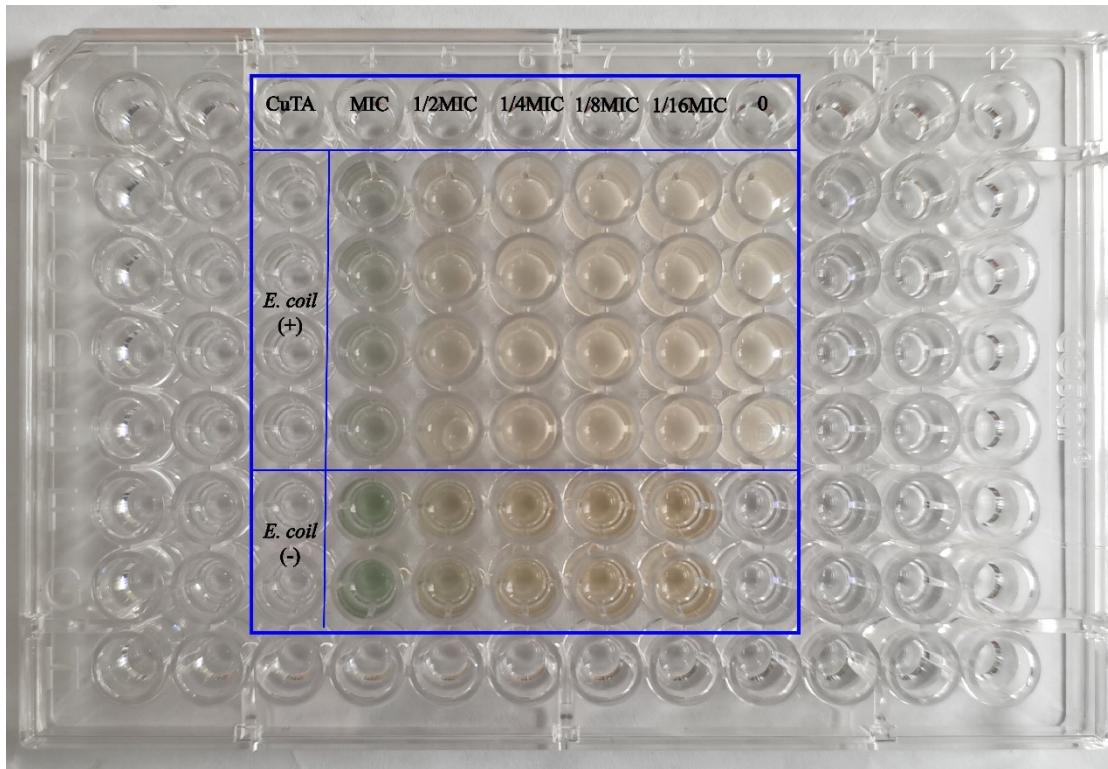

**Supplementary Figure 7.** The images show MIC measurement results.



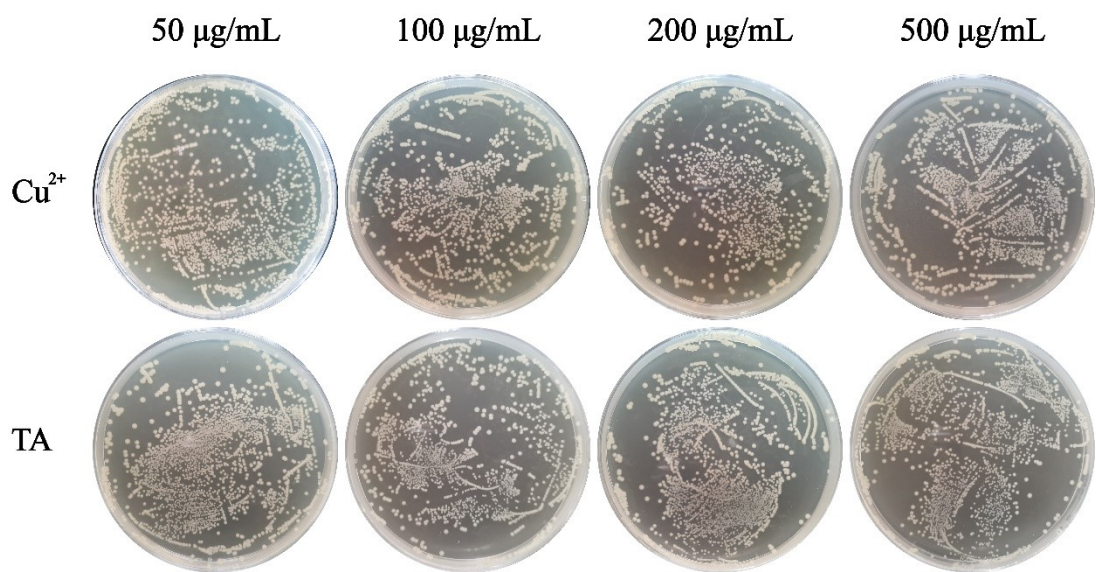

**Supplementary Figure 8.** Photographs of *E. coli* plates after treatment with different concentrations of  $\text{Cu}^{2+}$  and TA alone.

Table S1. The anti-bacteria of different forms of MPN-based materials

| Phenolic ligands | Metal ion        | Bacteria                        | Ref       |
|------------------|------------------|---------------------------------|-----------|
| TA               | Zn <sup>2+</sup> | <i>E. coli</i>                  | 1         |
| TA               | Fe <sup>3+</sup> | <i>S. aureus</i>                | 2         |
| GA               | Cu <sup>2+</sup> | <i>S. aureus, E. coli</i>       | 3         |
| EGCG             | Mg <sup>2+</sup> | <i>S. aureus, E. coli</i>       | 4         |
| PA               | Fe <sup>3+</sup> | <i>S. aureus, E. coli, MRSA</i> | 5         |
| TA               | Cu <sup>2+</sup> | <i>E. coli</i>                  | This Work |

## References

1. Ninan, N., Forget, A., Shastri, V. P., Voelcker, N. H., & Blencowe, A. Antibacterial and Anti-Inflammatory pH-Responsive Tannic Acid-Carboxylated Agarose Composite Hydrogels for Wound Healing, *ACS Appl. Mater. Interfaces* 2016, 8, 42, 28511–28521
2. Deng, H. , Yu, Z. , Chen, S. , Fei, L. , Sha, Q. , & Zhou, N. , et al. Facile and eco-friendly fabrication of polysaccharides-based nanocomposite hydrogel for photothermal treatment of wound infection - sciencedirect. *Carbohydrate Polymers*, 230.
3. Tu, Q. , Shen, X. , Liu, Y. , Zhang, Q. , Zhao, X. , & Maitz, M. F. , et al. (2019). A facile metal–phenolic–amine strategy for dual-functionalization of blood-contacting devices with antibacterial and anticoagulant properties. *Mater.chem.front*, 3(2), 265-275.
4. Hu, C. , Zhang, F. , Kong, Q. , Lu, Y. , & Wang, Y. . (2019). Synergistic chemical and photodynamic antimicrobial therapy for enhanced wound healing mediated by multifunctional light-responsive nanoparticles. *Biomacromolecules* 2019, 20, 12, 4581–4592
5. Liang, Y. , Li, Z. , Huang, Y. , Yu, R. , & Guo, B. . Dual-Dynamic-Bond Cross-Linked Antibacterial Adhesive Hydrogel Sealants with On-Demand Removability for Post-Wound-Closure and Infected Wound Healing, *ACS Nano* 2021, 15, 4, 7078–7093
